# Supplementary material for: Kinetic analysis of hydrolytic reaction of homo- and heterochiral adenylyl(3′–5′)adenosine isomers: breaking homochirality reduces hydrolytic stability of RNA
Source: Royal Society of Chemistry journal article supplement (doi:10.1039/b500673b), 2005-01-01
Supplement: b500673b.pdf [file b500673b.pdf]

**Electronic Supplementary Information**

**Kinetic analysis of hydrolytic reaction of homo- and heterochiral adenylyl(3'-5')adenosine isomers: breaking homochirality reduces hydrolytic stability of RNA**

Hidehito Urata,\* Rie Sasaki, Hiroyo Morita, Marina Kusumoto, Yoko Ogawa,  
Kozue Mitsuda, and Masao Akagi\*

*Osaka University of Pharmaceutical Sciences, 4-20-1 Nasahara, Takatsuki, Osaka 569-1094, Japan.  
E-mail: urata@gly.oups.ac.jp; Fax: +81 (72) 690 1005; Tel: +81 (72) 690 1089*

**Experimental**

The synthesis of the diastereomeric isomers of adenylyl(3'-5')adenosine (ApA) was reported previously.<sup>1</sup> Each dimer (D-(ApA), ADpAL, ALpAD and L-(ApA); 1 OD unit each) and deoxyadenosine (1 OD unit) as the internal standard were lyophilized in a 1.5 mL microtube. After the samples were dissolved in an aqueous buffer solution (1 mL) containing 0.2 M NaCl, 75 mM MgCl<sub>2</sub>, and 0.1 M HEPES (pH 8.0), silicone oil (400 μL) was layered on the solution to prevent evaporation. The reactions were started by heating the microtubes to an appropriate temperature (40-80°C). Aliquots (90 μL) of the solutions were withdrawn periodically and analyzed with reversed phase HPLC. The HPLC analysis was performed on a Shimadzu LC-6A system equipped with a Cosmosil 3C18 column (Nacalai Tesque, Kyoto, Japan; 4.6 x 50 mm, 3 μm particle size) with a linear gradient of acetonitrile (0-10 % during 15 min) in 50 mM potassium phosphate, pH 4.0.

Rate constants for the hydrolysis of the dimers were obtained by using the slope of the pseudo-first order rate plots. Half-lives for the hydrolysis of the dimers at 0 °C and 100 °C were calculated by the extrapolation of the Arrhenius plots (1/T vs. ln  $k_{\text{obs}}$ ). Activation parameters for the hydrolysis of the dimers were calculated by using the slopes and the y-intercepts of the Eyring plots [1/T vs. ln ( $k_{\text{obs}}/T$ )].

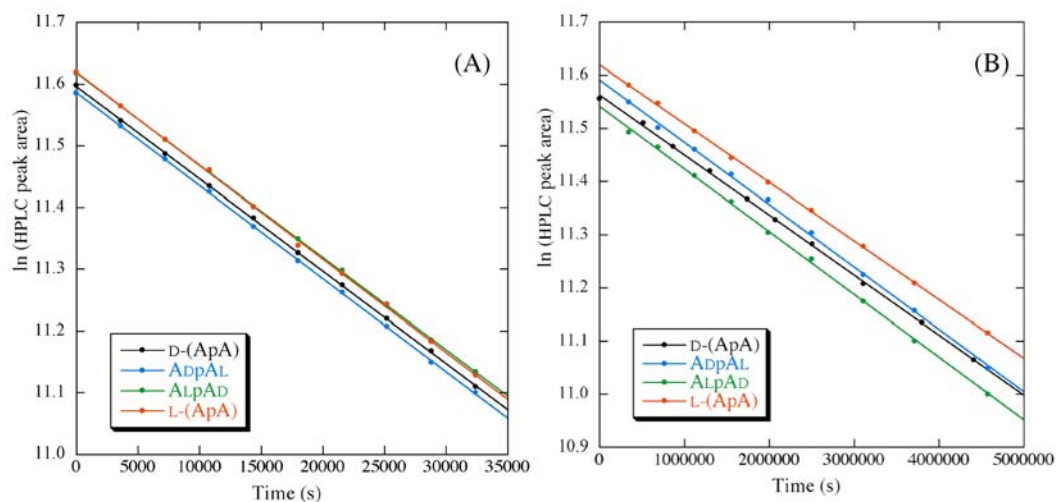

**Figure S1.** Kinetics of the hydrolysis of the diastereomeric ApAs at 80°C (A) and 40°C (B). Black, blue, green and red lines represent D-(ApA), ADpAL, ALpAD and L-(ApA), respectively.

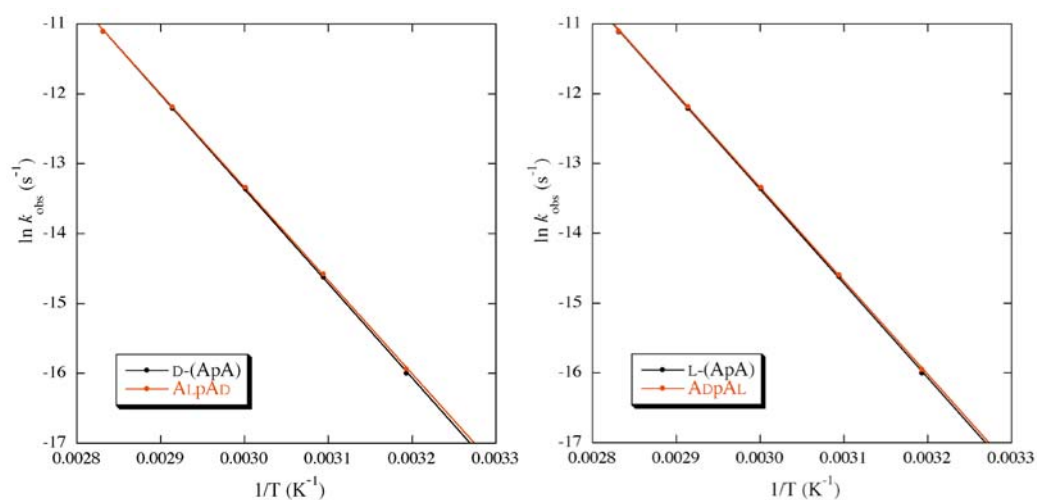

**Figure S2.** Arrhenius plots for the hydrolysis of the homochiral- (black) and heterochiral (red) ApAs.

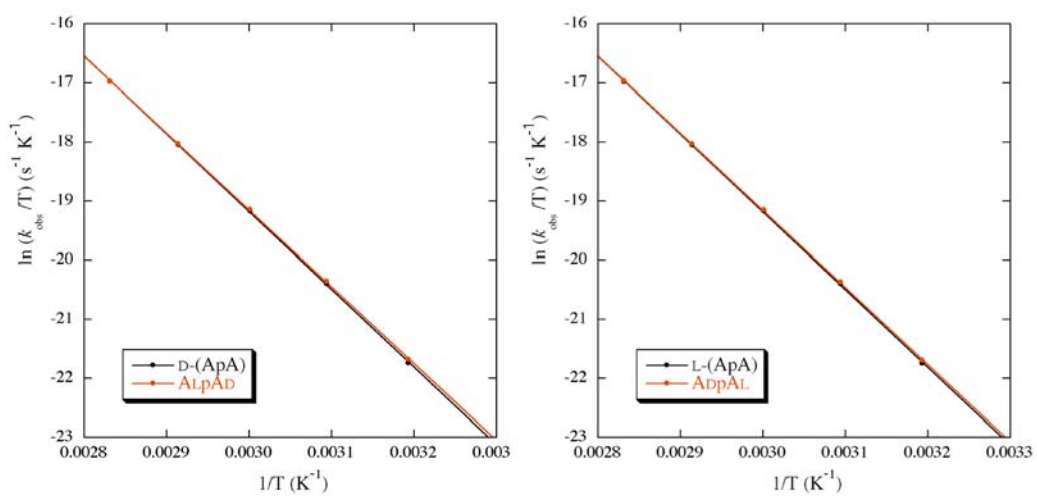

**Figure S3.** Eyring plots for the hydrolysis of the homochiral- (black) and heterochiral (red) ApAs.

## References

1. H. Urata, M. Go, N. Ohmoto, K. Minoura and M. Akagi, *Chem. Commun.* **2002**, 544–545.
